# Supplementary material for: Incremental significance and sex discrepancies of neck circumference on the odds of ischaemic stroke: a multistage, population-based, cross-sectional study from Northeast China
Source: HighWire-hosted journal article supplement (doi:10.1136/bmjopen-2021-056932), 2022-03-01
Supplement: bmjopen-2021-056932supp001_data_supplement.pdf [file bmjopen-2021-056932supp001_data_supplement.pdf]

## Supplementary figures and tables

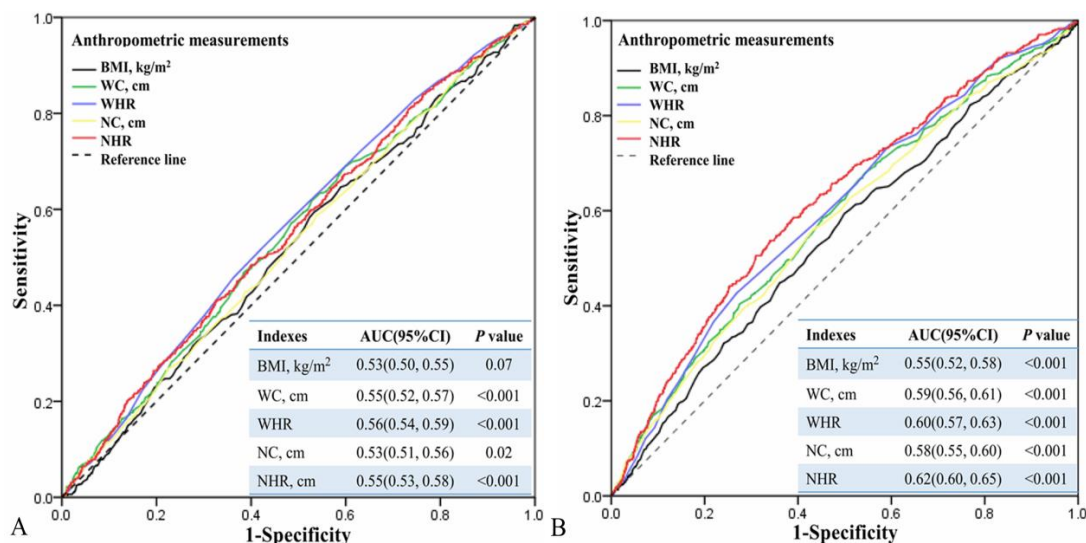

**Supplementary figure 1** Receiver operating characteristics curves comparing anthropometric measurements as discriminators of IS in men (A) and women (B).

Abbreviations: AUC, area under the curve; CI, confidence interval; IS, ischemic stroke; NC, neck circumference; NHR, Neck-to-height ratio; ROC, receiver operating characteristic; WC, waist circumference; WHR, waist-hip ratio.

## Supplementary figures and tables

**Supplementary table 1** Cut-off levels of NC and NHR to determine IS according to ROC analysis

| Indexes | Men     |                     |                     | Women   |                     |                     |
|---------|---------|---------------------|---------------------|---------|---------------------|---------------------|
|         | Cut-off | Sensitivity (95%CI) | Specificity (95%CI) | Cut-off | Sensitivity (95%CI) | Specificity (95%CI) |
| NC, cm  | >36.1   | 58.8 (54.3, 63.3)   | 46.2 (45.0, 47.4)   | >33.9   | 56.0 (51.4, 60.6)   | 56.8 (55.8, 57.7)   |
| NHR     | >0.223  | 49.7 (45.1, 54.3)   | 58.5 (57.3, 59.7)   | >0.220  | 53.7 (49.1, 58.3)   | 65.9 (65.0, 66.8)   |

Abbreviations: CI, confidence interval; IS, ischemic stroke; NC, neck circumference; NHR, Neck-to-height ratio; ROC, receiver operating characteristic.

## Supplementary figures and tables

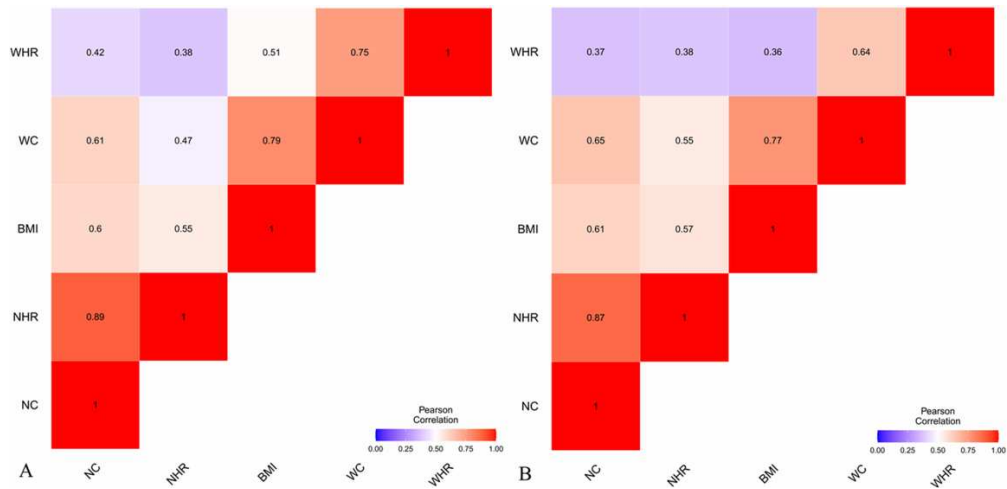

**Supplementary figure 2** The bivariate Pearson correlations between NC, NHR, BMI, WC, and WHR for men (A) and women (B), respectively.

*Abbreviations: NC, neck circumference; NHR, Neck-to-height ratio; NRI, net reclassification improvement, WC, waist; WHR, waist-to-hip ratio.*
